# Supplementary material for: The Role of DNA Methylation Reprogramming During Sex Determination and Transition in Zebrafish
Source: PubMed Central journal article supplement (PMC8640932; doi:10.1016/j.gpb.2020.10.004), 2021-02-19

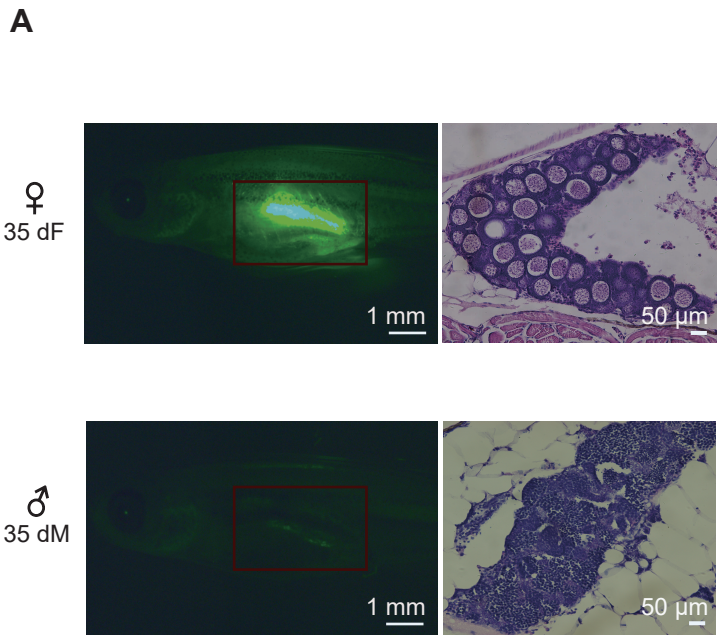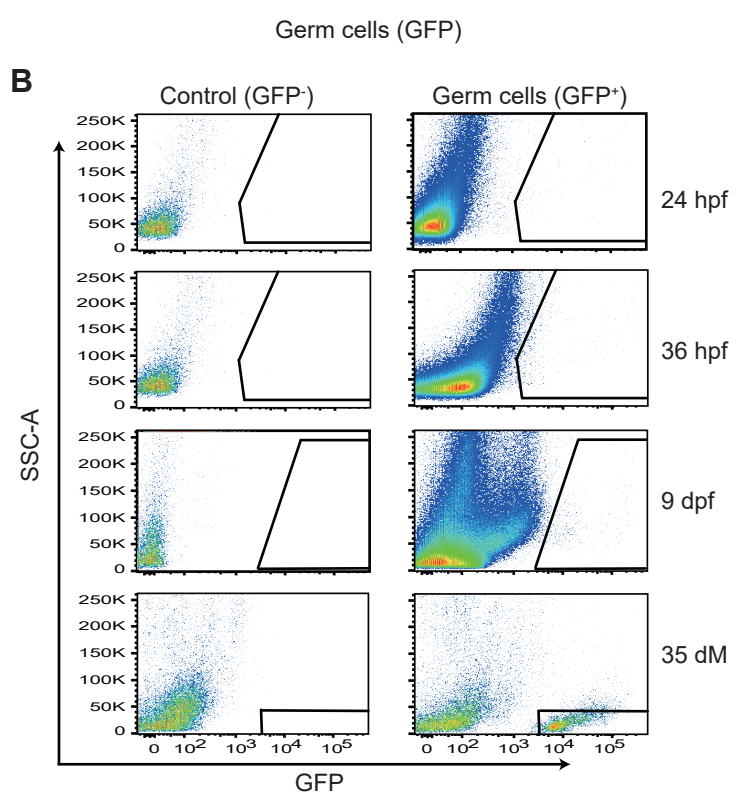

Supplement: mmc1.pdf [file mmc1.pdf]
